# Supplementary material
Source: PubMed Central journal article supplement (PMC9614457)
Supplement: kiac352_supplementary_data.pdf [file kiac352_supplementary_data.pdf]

1 **Supplemental Data**

2

3 **Wild-type allele of *TaHRC* suppresses calcium-mediated plant immune**  
4 **response by hijacking *TaCAXIP4* to trigger FHB susceptibility in wheat**

5

6 Hui Chen<sup>1</sup>, Zhenqi Su<sup>1,2</sup>, Bin Tian<sup>3,6</sup>, Guixia Hao<sup>4</sup>, Harold N. Trick<sup>3</sup>, Guihua Bai<sup>5,1\*</sup>

7

8 <sup>1</sup>Department of Agronomy, Kansas State University, Manhattan, KS 66506, USA

9 <sup>2</sup>College of Agriculture and Biotechnology, China Agricultural University, Beijing 100193,

10 China

11 <sup>3</sup>Department of Plant Pathology, Kansas State University, Manhattan, KS 66506, USA

12 <sup>4</sup>Mycotoxin Prevention and Applied Microbiology Research Unit, NCAUR, USDA-ARS, Peoria,  
13 IL 61604, USA.

14 <sup>5</sup>Hard Winter Wheat Genetics Research Unit, USDA-ARS, Manhattan, KS 66506, USA

15 <sup>6</sup>Current address: Syngenta Crop Protection, Research Triangle Park, Durham, NC 27709, USA

16

17 **\*\*Corresponding Authors:**

18 Hui Chen, [huichen98@ksu.edu](mailto:huichen98@ksu.edu)

19 Guihua Bai, [guihua.bai@ars.usda.gov](mailto:guihua.bai@ars.usda.gov)

20

21

22

23

24

25

26

27

28

29

30

## 31 **Materials and methods**

### 32 **Yeast Two-Hybrid (Y2H) screening and co-transformaiton assays**

33 Y2H screening experiment was performed with the ULTimate Y2H screen system by Hybrigenics  
34 Services (Paris, France <http://www.hybrigenics-services.com>). The full-length coding sequences  
35 (CDS) of *TaHRC* was amplified from ‘Clark’ (an *Fhb1* susceptible wheat cultivar) and then  
36 constructed into a bait vector (pGBKT7-TaHRC). The construct was verified by Sanger  
37 sequencing and used as a bait to screen a wheat cDNA library fused to Gal4. The full-length CDS  
38 of *TaCXIP4* from ‘Clark’ was amplified and constructed into a prey vector (pGADT7-TaCAXIP4),  
39 two N-terminal truncated fragments of *TaHRC* (one with a NLS domain, 1-96 aa; another without  
40 NLS domain, 1-81 aa) and the C-terminal truncated fragment (without NLS domain, 97-261 aa)  
41 were also amplified and cloned into a bait vector as pGBKT7-TaHRC-N, pGBKT7-TaHRC-  
42 NΔNLS and pGBKT7-TaHRC-C. The co-transformaiton assays were performed as described by  
43 the manufacturer (Clontech Laboratories, CA, USA). All the primers used for vectors construction  
44 were listed in [Supplemental Table S2](#).

45

### 46 **Mutants generation by CRISPR/Cas9 gene editing**

47 The single-guide RNA (sgRNA) was designed to target three different sites of *TaHRC* using the  
48 web-based E-CRISPR program (<http://www.e-crisp.org/E-CRISP/>). The details for construction  
49 of Cas9 and sgRNAs vectors as well as plant transformation, regeneration and selection processes  
50 for *TaHRC* mutants were described previously (Su et al., 2019). All primers used for vectors  
51 construction and mutants screening are listed in [Supplemental Table S2](#).

52

### 53 **FHB evaluation and statistical analysis**

54 The detailed protocol of FHB evaluation for mutant lines was described previously (Su et al.,  
55 2019). In brief, the mutant plants were phenotyped for FHB resistance in a growth chamber by  
56 injecting a conidial spore suspension of *F. graminearum* (GZ3639) into a central spikelet in a spike  
57 at early anthesis using a syringe (Hamilton, Reno, NV). Ten spikes per line were inoculated in  
58 each replication and each experiment had three replications. The percentage of symptomatic  
59 spikelets (PSS) of FHB symptom in a spike was calculated at 14 days after inoculation. For box  
60 plots, boxes indicate the 25th–75th percentile, whiskers indicate the full data range, center lines  
61 indicate medians, crosses indicate means and the numbers inside boxes indicate sample size. *P*-

62 values were generated from two-sided unpaired Student's t-tests of the mean PSS of the mutant  
63 lines versus the mean PSS of the non-edited line.

64

#### 65 **Bimolecular fluorescence complementation (BiFC) assay**

66 The full-length CDS of *TaHRC* and *TaCAXIP4* were amplified from 'Clark' and then cloned into  
67 the N-terminus and C-terminus of a split yellow fluorescent protein (YFP) in the expression vector  
68 pEarleygate201-YN and pEarleygate202-YC respectively, yielding YN-TaHRC and YC-  
69 TaCAXIP4 using the Gateway LR Clonase II enzyme mix kit ([Invitrogen](#)) as described previously  
70 ([Lu et al., 2010](#)). The mixed *Agrobacterium tumefaciens* (GV3101) cultures harboring equal  
71 concentrations of YN-TaHRC and YC-TaCAXIP4 vectors (final density OD600, 0.6) were  
72 infiltrated into 6-week-old epidermal *Nicotiana benthamiana* leaves. The signal of the  
73 reconstituted YFP fluorescence was observed and imaged at 48 hours after infiltration under a  
74 Zeiss LSM 880 confocal microscope (Carl Zeiss, Germany). All primers used for vectors  
75 construction are listed in [Supplemental Table S2](#).

76

#### 77 **Subcellular colocalization assay**

78 The full-length CDS of *TaHRC* and *TaCAXIP4* were cloned into in the expression vector  
79 pEarleygate103-GFP and pEarleygate102-CFP respectively, resulting in *TaHRC-GFP* and  
80 *TaCXIP4-CFP* using the Gateway LR Clonase II enzyme mix kit ([Invitrogen](#)) as described  
81 previously ([Lu et al., 2010](#)). The mixed *Agrobacterium tumefaciens* (GV3101) cultures harboring  
82 equal concentrations of *TaHRC-GFP* and *TaCXIP4-CFP* (final density OD600, 0.6) were  
83 infiltrated into 6-week-old epidermal *Nicotiana benthamiana* leaves. The GFP and CFP  
84 fluorescence signals at 48 hours after infiltration were observed and imaged under a Zeiss LSM  
85 880 confocal microscope (Carl Zeiss, Germany) in two channels and merged using a lookup table  
86 with raw data in green and cyan colors, respectively. All primers used for vectors construction are  
87 listed in [Supplemental Table S2](#).

88

#### 89 **Yeast Ca<sup>2+</sup> supression assay**

90 A Ca<sup>2+</sup> sensitive yeast strain K667 (hypersensitive to high concentrations of Ca<sup>2+</sup>) was used for  
91 yeast transformation. The full-length CDS of *TaCAX1*, *TaCAXIP4* and *TaHRC* from 'Clark' were  
92 cloned into the yeast expression vector pGBKT7 and transformed/cotransformed into K667 yeast

93 cells. Yeast cells expressing/coexpressing *TaCAX1*, *TaCAXIP4* and *TaHRC* were assayed on a  
94 yeast extract/peptone/dextrose (YPD) medium supplemented with and without 200 mM CaCl<sub>2</sub>,  
95 respectively. The detail protocol for yeast transformation was described previously ([Cheng et al.,](#)  
96 [2004](#)). All primers used for vectors construction are listed in [Supplemental Table S2](#).

97

### 98 **Reactive oxygen species (ROS) measurement**

99 To examine whether *TaHRC* and *TaCaXIP4* affect ROS production in planta, ROS assay was  
100 performed in *N. benthamiana* leaves expressing *GFP* (Control), *TaHRC-GFP*, *TaCaXIP4-GFP* or  
101 both using a luminol-based chemiluminescence assay ([Hao et al. 2019](#)). *A. tumefaciens* GV3101  
102 strains carrying *TaHRC-GFP* or *TaCaXIP4-GFP* were cultured overnight. The cultures were  
103 centrifuged, washed, and suspended in Agromix (10 mM MgCl<sub>2</sub>, 10 mM MES, and 100 μM  
104 acetosyringone). The cell suspension was infiltrated or co-infiltrated into 4- to 5-week-old *N.*  
105 *benthamiana* leaves with an OD600 of 0.4. Two days after infiltration, twelve leaf discs were  
106 removed from infiltrated zones with a cork borer and floated on water overnight. On the next day,  
107 water was replaced with 200 μL of the assay solution: 17 mM luminol L012, 1 μM horseradish  
108 peroxidase ([Sigma, St. Louis, MO](#)), and 100 μg/mL crab shell chitin ([Sigma, St. Louis, MO](#)).  
109 Luminescence was measured for 60 min using the Synergy HT and Gen5 software ([BioTek](#)  
110 [Instruments, Inc. Winooski, VT](#)).

111

### 112 **References**

- 113 1. **Su, Z., Bernardo, A., Tian, B., Chen, H., Wang, S., Ma, H., Cai, S., Liu, D., Zhang, D., Li,**  
114 **T., Trick, H., Amand, P.S., Yu, J., Zhang, Z., and Bai, G.** (2019). A deletion mutation in  
115 *TaHRC* confers *Fhb1* resistance to *Fusarium* head blight in wheat. *Nature Genetics*, 51, 1099-  
116 1105.
- 117 2. **Lu, Q., Tang, X., Tian, G., Wang, F., Liu, K., Nguyen, V., Kohalmi, S.E., Keller, W.A.,**  
118 **Tsang, E.W., Harada, J.J., Rothstein, S.J., and Cui, Y.** (2010). Arabidopsis homolog of the  
119 yeast TREX-2 mRNA export complex: components and anchoring nucleoporin. *The Plant*  
120 *Journal*, 61, 259-270.
- 121 3. **Cheng, N. H., Liu, J. Z., Nelson, R. S., and Hirschi, K. D.** (2004). Characterization of *CXIP4*,  
122 a novel Arabidopsis protein that activates the H<sup>+</sup>/Ca<sup>2+</sup> antiporter, *CAX1*. *FEBS Letters*, 559,  
123 99-106.

124 4. **Hao, G., McCormick, S., Vaughan, M.M., Naumann, T.A., Kim, H.S., Proctor, R., Kelly,**  
125 **A., and Ward, T.J.** (2019). *Fusarium graminearum* arabinanase (Arb93B) enhances wheat head  
126 blight susceptibility by suppressing plant immunity. *Molecular Plant-Microbe Interactions*, 32,  
127 888-898.



**Supplemental Table S2. Primer sequences used in this study**

| Number | Name              | Sequence(5'----3')                                      |                                                                       |
|--------|-------------------|---------------------------------------------------------|-----------------------------------------------------------------------|
| 1      | TaHRC_CDS_F       | ATGGATGCCAAGAAGTTCCT                                    | For full-length CDS amplification                                     |
| 2      | TaHRC_CDS_R       | TTACACGAGTTGCTTCCCGT                                    |                                                                       |
| 3      | TaCAXIP4_CDS_F    | ATGGACGACGACATCCAAGCTGGC                                |                                                                       |
| 4      | TaCAXIP4_CDS_R    | TTAGCCCCTCTTATGCTCCTACT                                 |                                                                       |
| 5      | TaCAX1-CDS_F      | ATGGATAGCCAGTCCGCGGTGACG                                |                                                                       |
| 6      | TaCAX1-CDS_R      | TTATGCGACCTGGACAATCATGGG                                | For Y2H screen and co-transformation assays                           |
| 7      | BK_TaHRC_CDS_F    | CATGGAGGCCGAATTCATGGATGCCAAGAAGTTCCTGCAG                |                                                                       |
| 8      | BK_TaHRC_CDS_R    | GCAGGTCGACTTACACGAGTTGCTTCCCGTCTCT                      |                                                                       |
| 9      | BK_TaHRC_N_R      | GCAGGTCGACCTTGGCCTCCTGGACCAT                            |                                                                       |
| 10     | BK_TaHRC_NΔNLS_R  | GCAGGTCGACGTGCCTTTTGGGTCCTTCC                           |                                                                       |
| 11     | BK_TaHRC_C_F      | CATGGAGGCCGAATTCATGCACAGGTCAAAGAGGAGGAG                 | For gRNA vectors construction                                         |
| 12     | BK_TaHRC_C_R      | GCAGGTCGACTTACACGAGTTGCTTCCCGTCT                        |                                                                       |
| 13     | AD_TaCAXIP4_CDS_F | GGAGGCCAGTGAATTCATGGACGACGACATCCAAGCTGGC                |                                                                       |
| 14     | AD_TaCAXIP4_CDS_R | CGAGCTCGATGGATCCTTAGCCCCTCTTATGCTCCTACT                 |                                                                       |
| 15     | TaHRC_gRNA1_F     | CTTGGCGACAGTATCGGAAACAC                                 |                                                                       |
| 16     | TaHRC_gRNA1_R     | AAACGTGTTCCGATCACTGTCGC                                 | For BiFC, Subcellular Colocalization, Ca2+ Suppression and ROS assays |
| 17     | TaHRC_gRNA2_F     | CTTGGTGCCAGGAGGCGCAAGCAC                                |                                                                       |
| 18     | TaHRC_gRNA2_R     | AAACGTGCTTGGCCTCCTGGCAC                                 |                                                                       |
| 19     | TaHRC_gRNA3_F     | CTTGGGAAGAAGCACTCGCACAGG                                |                                                                       |
| 20     | TaHRC_gRNA3_R     | AAACCCTGTGCGAGTGCTTCTCC                                 |                                                                       |
| 21     | TaHRC_CDS_GW_F    | GGGGACAAGTTTGTACAAAAAAGCAGGCTTCATGGATGCCAAGAAGTTCCT     | For BiFC, Subcellular Colocalization, Ca2+ Suppression and ROS assays |
| 22     | TaHRC_CDS_GW_R    | GGGGACCACTTTGTACAAGAAAGCTGGGTCCACGAGTTGCTTCCCGT         |                                                                       |
| 23     | TaHsp_CDS_GW_F    | GGGGACAAGTTTGTACAAAAAAGCAGGCTTCATGGATCAAGGGTTGTGTTCTCC  |                                                                       |
| 24     | TaHsp_CDS_GW_R    | GGGGACCACTTTGTACAAGAAAGCTGGGTCTAGTCGACGTTGACCTCGAAGAC   |                                                                       |
| 25     | TaCAXIP4_CDS_GW_F | GGGGACAAGTTTGTACAAAAAAGCAGGCTTCATGGACGACGACATCCAAGCTGGC |                                                                       |
| 26     | TaCAXIP4_CDS_GW_R | GGGGACCACTTTGTACAAGAAAGCTGGGTCCGCCCTCTTATGCTCCTACT      |                                                                       |
| 27     | BK_TaCAX1_CDS_F   | CATGGAGGCCGAATTCATGGATAGCCAGTCCGCGGTGACG                |                                                                       |
| 28     | BK_TaCAX1_CDS_R   | GCAGGTCGACGGATCCTTATGCGACCTGGACAATCATGGG                |                                                                       |
| 29     | BK_TaCAXIP4_CDS_F | CATGGAGGCCGAATTCATGGACGACGACATCCAAGCTGGC                |                                                                       |
| 30     | BK_TaCAXIP4_CDS_R | GCAGGTCGACTTAGCCCCTCTTATGCTCCTACT                       |                                                                       |
